# Supplementary material
Source: PubMed Central journal article supplement (PMC4291552)
Supplement: NIHMS645416-supplement-supplement_1.pdf [file NIHMS645416-supplement-supplement_1.pdf]

167

168 **Figure Legends:**

169

170 **Table E1.** Baseline characteristics of subjects

171

172 **Figure 1.** WFL/BMI Percentiles by Age Group. This figure compares mean WFL/BMI  
173 percentiles of 4 groups of children: healthy controls (HC), food allergic (FA), cystic  
174 fibrosis (CF), and celiac disease (CD). ). P-values represent Wald statistics of difference  
175 between the healthy and food allergy groups; error bars represent 95% confidence  
176 intervals.

177

178 **Figure 2.** Growth Percentiles per Number of Food Allergies. Within the food-allergic  
179 cohort, 192 subjects were found to have 1-2 food allergies and 52 were found to have >2  
180 food allergies. Those with >2 allergies had significantly lower mean weight percentile  
181 (55.3 [95% CI: 46.3-64.4] vs. 69.2 [95% CI: 65.1-73.3],  $p<0.01$ ) and height percentile  
182 (62.2 [95% CI:53.1-71.2] vs. 74.8 [71.1-78.5],  $p<0.05$ ) percentiles, respectively.

Table E1.

| Characteristic  | Food Allergic (FA) | Healthy Controls (HC) | Cystic Fibrosis (CF) | Celiac Disease (CD) |
|-----------------|--------------------|-----------------------|----------------------|---------------------|
| Number          | 245                | 4584                  | 106                  | 102                 |
| Age, n (%)**    |                    |                       |                      |                     |
| 0-2 years       | 90 (36.7)          | 2430 (53.0)           | 31 (30.1)            | 13 (12.8)           |
| >2 years        | 155 (63.3)         | 2154 (47.0)           | 72 (69.9)            | 89 (87.3)           |
| Age, mean years | 4.1                | 3.3                   | 5.1                  | 6.7                 |
| Sex, n (%)*     |                    |                       |                      |                     |
| Male            | 141(57.5)          | 2222 (48.5)           | 51(49.5)             | 42 (41.2)           |
| Female          | 104(42.5)          | 2362 (51.5)           | 52 (50.5)            | 60 (58.8)           |
| Race, n (%)**   |                    |                       |                      |                     |
| Caucasian       | 119 (48.6)         | 1146 (25.0)           | 93 (90.3)            | 86 (84.3)           |
| AA              | 71 (29.0)          | 1624 (35.4)           | 2 (1.9)              | 0                   |
| Other           | 55 (22.4)          | 1814 (39.6)           | 8 (7.8)              | 14 (15.7)           |

\*p<0.05, from Pearson chi-square test

\*\*p<0.01, from Pearson chi-square test
